# Supplementary material for: Sensitive determination of glycerol by derivatization using a HPLC-DAD method in biodiesel samples
Source: Royal Society of Chemistry journal article supplement (doi:10.1039/c5ay01761k), 2015-01-01
Supplement: c5ay01761k1.pdf [file c5ay01761k1.pdf]

## Supplementary materials

**Table S1:** Intra-day and Inter-day analysis.

| <b>Conc.</b><br><b>(<math>\mu\text{g/mL}</math>)</b> | <b>DAY 1</b>                                         |                             |                               | <b>DAY 2</b>                                         |                             |                               |
|------------------------------------------------------|------------------------------------------------------|-----------------------------|-------------------------------|------------------------------------------------------|-----------------------------|-------------------------------|
|                                                      | <b>Found</b><br><b>(<math>\mu\text{g/mL}</math>)</b> | <b>R.S.D.</b><br><b>(%)</b> | <b>Accuracy</b><br><b>(%)</b> | <b>Found</b><br><b>(<math>\mu\text{g/mL}</math>)</b> | <b>R.S.D.</b><br><b>(%)</b> | <b>Accuracy</b><br><b>(%)</b> |
| 80.00                                                | 80.0 $\pm$ 0.3                                       | 0.39                        | 100.04                        | 80.2 $\pm$ 0.3                                       | 0.43                        | 100.62                        |
| 50.00                                                | 49.61 $\pm$ 0.03                                     | 0.06                        | 99.22                         | 49.62 $\pm$ 0.03                                     | 0.06                        | 99.28                         |
| 20.00                                                | 19.80 $\pm$ 0.00                                     | 0.01                        | 99.01                         | 19.80 $\pm$ 0.00                                     | 0.02                        | 99.04                         |

**Table S2:** Summary of the robustness parameters.

| <b>Parameter</b>         | <b>Modification</b> | <b>Standard deviation</b> | <b>CV (%)</b> |
|--------------------------|---------------------|---------------------------|---------------|
| Mobile Phase Composition | 10.5:89.5           | 0.5                       | 2.01          |
|                          | 10:90               |                           |               |
|                          | 9.5:90.5            |                           |               |
| Temperature              | 31.5                | 0.04                      | 0.15          |
|                          | 30                  |                           |               |
|                          | 28.5                |                           |               |
| Wavelength               | 238                 | 0.6                       | 2.53          |
|                          | 239                 |                           |               |
|                          | 240                 |                           |               |
| Flow rate                | 0.74                | 0.6                       | 2.39          |
|                          | 0.70                |                           |               |
|                          | 0.67                |                           |               |

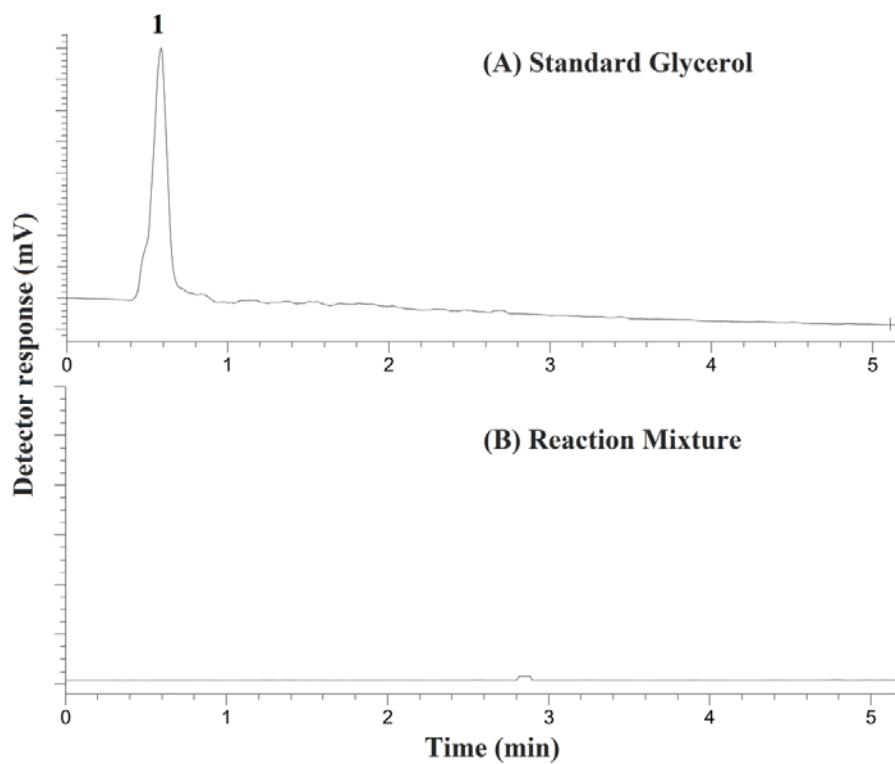

**Figure S1:** HPLC-ELSD Chromatogram of (A) Peak 1 standard glycerol at RT  $0.59 \pm 0.03$  (B) Reaction mixture

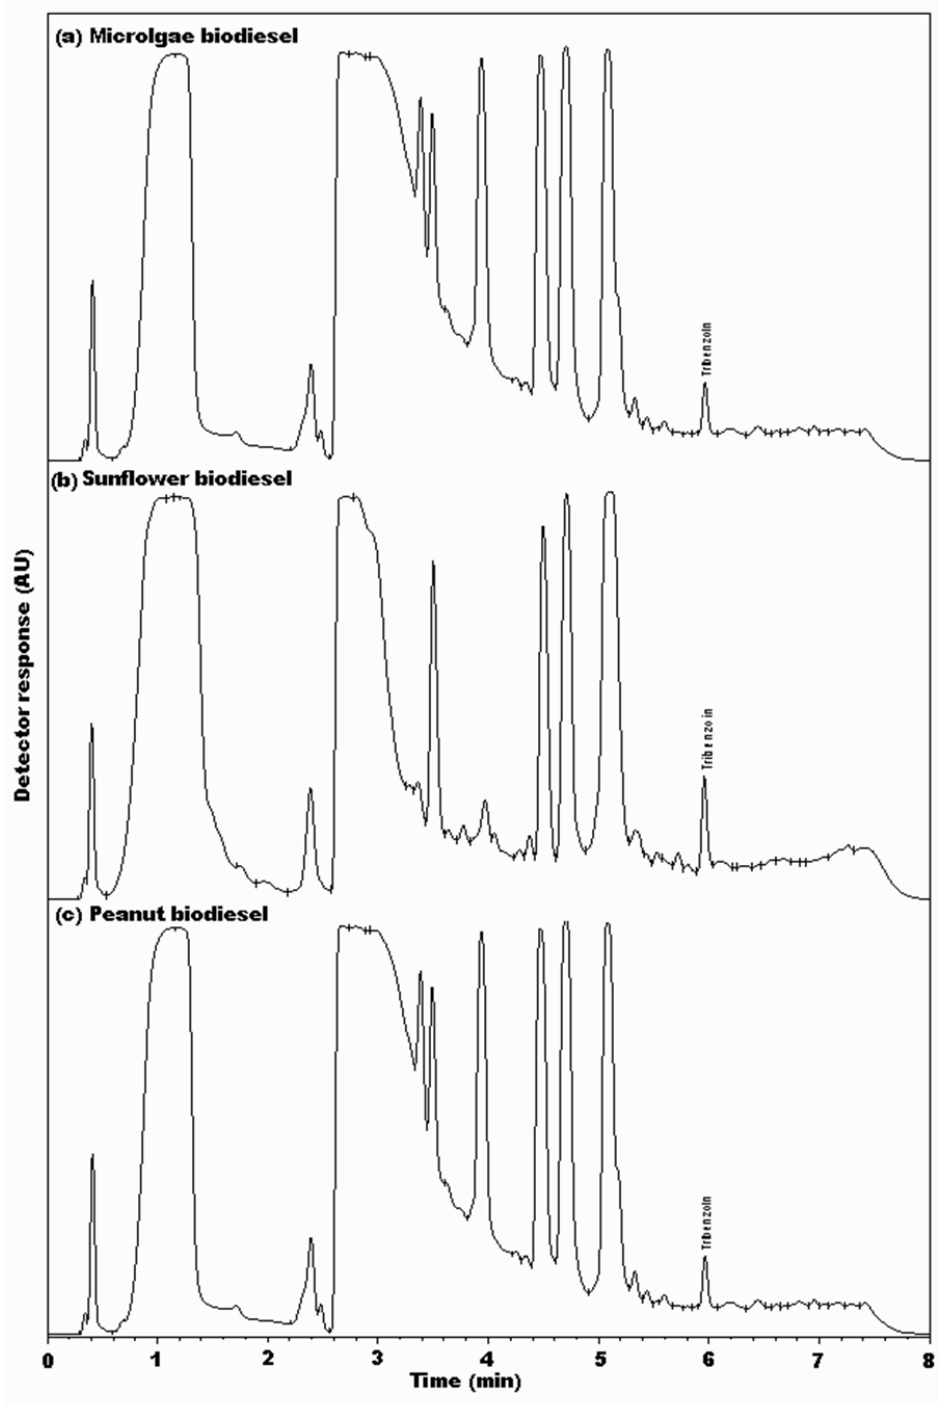

**Figure S2:**Chromatogram of microalgal (A), sunflower (B) and peanut (C) biodiesel sample, Peak 1  
GTB (RT:  $5.97 \pm 0.01$ )

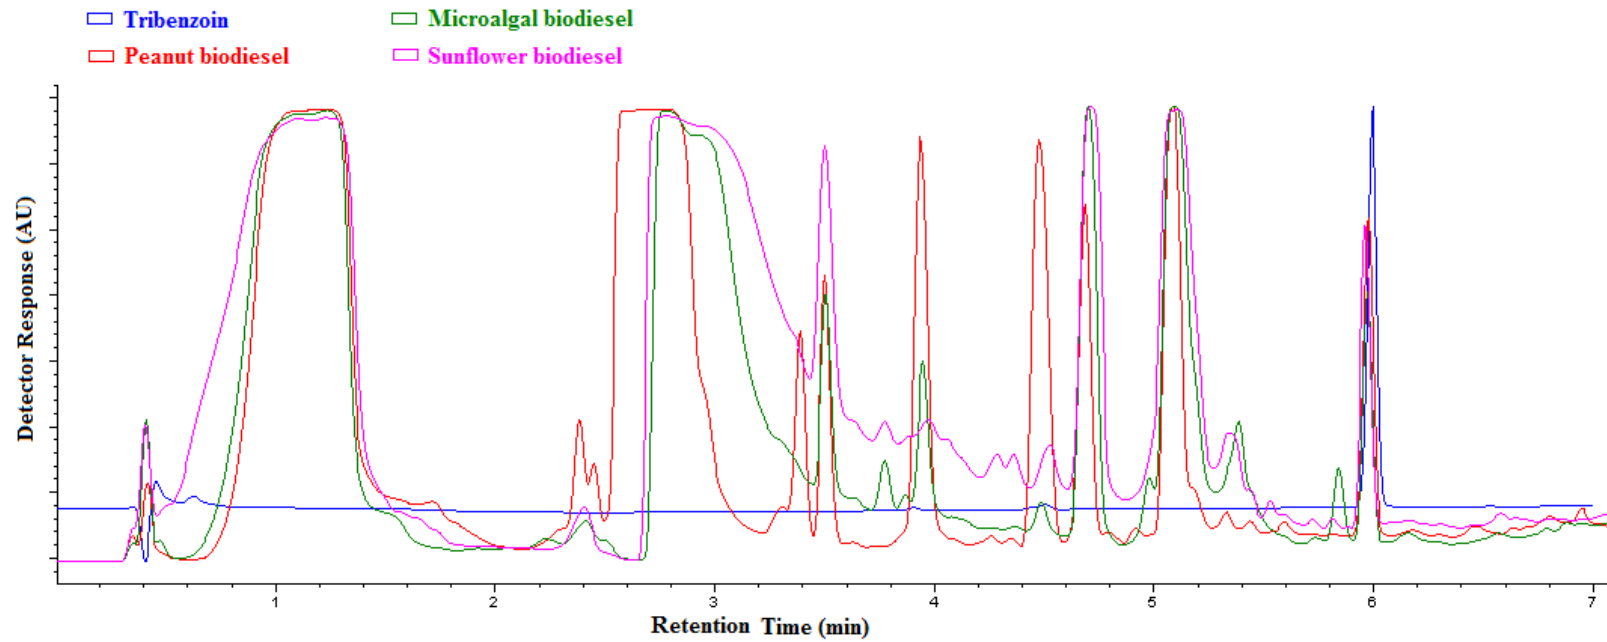

**Figure S3:** Overlaid chromatograms of standard (blue), microalgal biodiesel (green), peanut biodiesels (red), and sunflower biodiesel (pink)
